# Supplementary material
Source: MDPI journal article supplement (https://www.mdpi.com/0718-1876/17/1/2)
Supplement: s1 [file s1]

## **Supplementary Materials S**

### **A literature review of taxes in cross-border supply chain modeling: Themes, tax types and new trade-offs**

#### **Content**

|                                                                                                                       |          |
|-----------------------------------------------------------------------------------------------------------------------|----------|
| <b>A literature review of taxes in cross-border supply chain modeling: Themes, tax types and new trade-offs .....</b> | <b>1</b> |
| S1. Regional distribution of the selected publications .....                                                          | 2        |
| S2. Journal distribution of the selected publications.....                                                            | 3        |
| S3. Top-cited publications.....                                                                                       | 4        |
| S4. Most influential authors .....                                                                                    | 5        |
| References: .....                                                                                                     | 7        |

## S1. Regional distribution of the selected publications

Table S1-1 presents the top five countries by the publication number; they are the United States (25 publications), People's Republic of China (16 publications), the United Kingdom (8 publications), Canada (5 publications), Germany (4 publications). The publication number of these five countries accounts for 82% of the total sample size. These above-mentioned countries are also important components of the world cross-border trade. According to WTO, these five countries accounted for 39% of the world's total commodity exports in 2019 [1].

Table S1-1. Regional distribution of the selected publications

| Country                    | Publication number | Percentage |
|----------------------------|--------------------|------------|
| The United States          | 25                 | 35.3%      |
| People's Republic of China | 16                 | 22.5%      |
| The United Kingdom         | 8                  | 11.3%      |
| Canada                     | 5                  | 7.0%       |
| Germany                    | 4                  | 6.0%       |
| Others                     | 13                 | 18.0%      |

Note: The data of People's Republic of China includes: Chinese mainland, Hong Kong, Macao, but not includes Taiwan, China. Access date: 2021.02.01

## S2. Journal distribution of the selected publications

Table S2-1 presents the top five journals from the perspective of the selected publication number and the citations of the selected publications in each journal. From the perspective of selected publication number, the top five journals are International Journal of Production Economics (13), European Journal of Operational Research (8), International Journal of Production Research (5), Manufacturing & Service Operations Management (5), Transportation Research Part E-Logistics and Transportation Review (4). From the perspective of citations, the top five journals are International Journal of Production Economics (589), Interfaces (436), European Journal of Operational Research (283), Operations Research (253), Transportation Research Part E-Logistics and Transportation Review (79).

Table S2-1. Journal distribution of the selected publications

| Publication number | Journals                                                           | Citations | Journals                                                           |
|--------------------|--------------------------------------------------------------------|-----------|--------------------------------------------------------------------|
| 13                 | International Journal of Production Economics                      | 589       | International Journal of Production Economics                      |
| 8                  | European Journal of Operational Research                           | 436       | Interfaces                                                         |
| 5                  | International Journal of Production Research                       | 283       | European Journal of Operational Research                           |
| 5                  | Manufacturing & Service Operations Management                      | 253       | Operations Research                                                |
| 4                  | Transportation Research Part E-Logistics and Transportation Review | 79        | Transportation Research Part E-Logistics and Transportation Review |

### S3. Top-cited publications

According to [Rebs, et al. \[2\]](#), two indicators, i.e., the global citation score (GCS) and the local citation score (LCS), were considered to identify the influential publications among the selected articles. Among them, the local citation score means the citations number to a paper among the selected articles, and the global citation score means the total citations number to a paper in the core collection of WoS.

From the perspective of GCS (see the left column of [Table A3-1](#)), the most cited article is [Arntzen, et al. \[3\]](#) published at *Interfaces*; it is known as the fundamental drivers of the implementation of the network design model in the research of CBSC. From the LCS's perspective, the most cited article is [Huh and Park \[4\]](#) published at *Naval Research Logistics*.

[Table S3-1](#). Top-five articles with the most GCS and LCS

| GCS | Publications                                 | LCS | Publications                        |
|-----|----------------------------------------------|-----|-------------------------------------|
| 432 | <a href="#">Arntzen, et al. [3]</a>          | 10  | <a href="#">Huh and Park [4]</a>    |
| 247 | <a href="#">Huchzermeier and Cohen [5]</a>   | 9   | <a href="#">Hsu and Zhu [6]</a>     |
| 189 | <a href="#">Vidal and Goetschalckx [7]</a>   | 7   | <a href="#">Shunko, et al. [8]</a>  |
| 126 | <a href="#">Tsiakis and Papageorgiou [9]</a> | 7   | <a href="#">Shunko, et al. [10]</a> |
| 99  | <a href="#">Soysal, et al. [11]</a>          | 6   | <a href="#">Xiao, et al. [12]</a>   |

#### S4. Most influential authors

This paper identifies the most influential authors in this area from two aspects: publication number and local citation number. First, the most productive author analysis (see [Table A4-1](#)) indicates that Baozhuang Niu from South China University of Technology is the most productive researcher in this field, followed by Masha Shunko (Purdue University), Vernon N Hsu (Chinese University of Hong Kong), Stefan Minner (Technische Universität München), and Srinagesh Gavirneni (Cornell University).

[Table S4-1](#). Top-five productive authors of the selected articles

| Rank | Author              | Counts | Institution                          | Country (Region)           |
|------|---------------------|--------|--------------------------------------|----------------------------|
| 1    | Baozhuang Niu       | 5      | South China University of Technology | People's Republic of China |
| 2    | Masha Shunko        | 3      | Purdue University                    | The United States          |
| 3    | Vernon N Hsu        | 3      | Chinese University of Hong Kong      | People's Republic of China |
| 4    | Stefan Minner       | 2      | Technische Universität München       | Germany                    |
| 5    | Srinagesh Gavirneni | 2      | Cornell University                   | The United States          |

Second, the local citation analysis to the authors in selected articles (see [Table S4-2](#)) indicate that Carlos J. Vidal from the University of Valle is the most cited author in this area, followed by Morris A. Cohen (University of Pennsylvania), Bruce C. Arntzen (Digital Equipment Corporation), Masha Shunko (Purdue University), Woonghee Tim Huh (University of British Columbia), Amiya K. Chakravarty (Tulane University), and Vernon N Hsu (Chinese University of Hong Kong).

[Table S4-2](#). Top-seven authors with the most LCS

| Rank | Author               | LCS | Institution                     | Country (Region)      |
|------|----------------------|-----|---------------------------------|-----------------------|
| 1    | Carlos J. Vidal      | 18  | University of Valle             | Colombia              |
| 2    | Morris A. Cohen      | 14  | University of Pennsylvania      | The United States     |
| 3    | Bruce C. Arntzen     | 11  | Digital Equipment Corporation   | The United States     |
| 4    | Masha Shunko         | 11  | Purdue University               | The United States     |
| 5    | Woonghee Tim Huh     | 11  | University of British Columbia  | Canada                |
| 6    | Amiya K. Chakravarty | 9   | Tulane University               | The United States     |
| 7    | Vernon N Hsu         | 8   | Chinese University of Hong Kong | Hongkong, P. R. China |

By combining the above two aspects, Masha Shunko (Purdue University) and Vernon N

Hsu (Chinese University of Hong Kong) were considered the most outstanding contributors in this field because they perform well in both production numbers and local citations.

## References:

- [1] Nagurney, A.; Besik, D.; Nagurney, L.S. Global supply chain networks and tariff rate quotas: Equilibrium analysis with application to agricultural products. *J. Glob. Optim.* **2019**, *75*, 439-460, doi:10.1007/s10898-019-00794-x.
- [2] Rebs, T.; Brandenburg, M.; Seuring, S. System dynamics modeling for sustainable supply chain management: A literature review and systems thinking approach. *Journal of Cleaner Production* **2019**, *208*, 1265-1280, doi:10.1016/j.jclepro.2018.10.100.
- [3] Arntzen, B.C.; Brown, G.G.; Harrison, T.P.; Trafton, L.L. Global supply chain management at Digital Equipment Corporation. *Interfaces* **1995**, *25*, 69-93, doi:10.1287/inte.25.1.69.
- [4] Huh, W.T.; Park, K.S. Impact of transfer pricing methods for tax purposes on supply chain performance under demand uncertainty. *Nav. Res. Logist.* **2013**, *60*, 269-293, doi:10.1002/nav.21533.
- [5] Huchzermeier, A.; Cohen, M.A. Valuing operational flexibility under exchange rate risk. *Oper. Res.* **1996**, *44*, 100-113, doi:10.1287/opre.44.1.100.
- [6] Hsu, V.N.; Zhu, K.J. Tax-effective supply chain decisions under China's export-oriented tax policies. *M&SOM-Manuf. Serv. Oper. Manag.* **2011**, *13*, 163-179, doi:10.1287/msom.1100.0312.
- [7] Vidal, C.J.; Goetschalckx, M. A global supply chain model with transfer pricing and transportation cost allocation. *Eur. J. Oper. Res.* **2001**, *129*, 134-158, doi:10.1016/s0377-2217(99)00431-2.
- [8] Shunko, M.; Do, H.T.; Tsay, A.A. Supply chain strategies and international tax arbitrage. *Production and Operations Management* **2017**, *26*, 231-251, doi:10.1111/poms.12629.
- [9] Tsiakis, P.; Papageorgiou, L.G. Optimal production allocation and distribution supply chain networks. *Int. J. Prod. Econ.* **2008**, *111*, 468-483, doi:10.1016/j.ijpe.2007.02.035.
- [10] Shunko, M.; Debo, L.; Gavirneni, S. Transfer Pricing and Sourcing Strategies for Multinational Firms. *Production and Operations Management* **2014**, *23*, 2043-2057, doi:10.1111/poms.12175.
- [11] Soysal, M.; Bloemhof-Ruwaard, J.M.; van der Vorst, J. Modelling food logistics networks with emission considerations: The case of an international beef supply chain. *Int. J. Prod. Econ.* **2014**, *152*, 57-70, doi:10.1016/j.ijpe.2013.12.012.
- [12] Xiao, W.Q.; Hsu, V.N.; Hu, Q.H. Manufacturing capacity decisions with demand uncertainty and tax cross-crediting. *M&SOM-Manuf. Serv. Oper. Manag.* **2015**, *17*, 384-398, doi:10.1287/msom.2015.0526.
